# Supplementary material
Source: publisher figshare collection journal article supplement (https://asha.figshare.com/ndownloader/files/30582009)
Supplement: Supplementary file 1 [file 30582009]

## Supplemental Material S1. Listening Survey Summer 2020.

How old are you?

- Younger than 40 years
- 40-44 years old
- 45-49 years old
- 50-54 years old
- 55-59 years old
- 60-64 years old
- 65-69 years old
- 70-74 years old
- 75-79 years old
- 80-84 years old
- 85-89 years old
- 90 years or older

In what state do you reside?

▼ AL ... Puerto Rico or other US Territory

What best describes your gender?

- Male
  - Female
  - Gender variant/Non-conforming/Non-binary
  - None of the above
  - Prefer not to answer
- 

I identify as...

- Asian
  - Black/African
  - Caucasian
  - Hispanic/Latinx
  - Native American
  - Pacific Islander
  - Prefer not to answer
-

What is the highest level of education you have completed?

- Some high school
  - High school diploma or general equivalency diploma
  - Some college or Associate's Degree
  - College degree or higher
  - Prefer not to answer
- 

How would you rate your general health?

- Excellent
  - Good
  - Fair
  - Poor
- 

Do you have trouble seeing even when wearing glasses or contact lenses?

- Yes
  - No
-

How would you rate your hearing?

- Excellent
- Good
- Fair
- Poor

---

*Display This Question:*

*If How would you rate your hearing? != Excellent*

Do you currently use hearing aids?

- Yes
- No

---

*Display This Question:*

*If Do you currently use hearing aids? = Yes*

How old were you when you first started using hearing aids?

- Less than 5 years old
- 5 years - 20 years of age
- 21 years of age - 40 years of age
- 41 years of age - 50 years of age
- 51 years of age - 60 years of age
- 61 years of age - 70 years of age
- 71 years of age - 80 years of age
- 81 years of age - 90 years of age
- Older than 90 years of age

---

*Display This Question:*

*If Do you currently use hearing aids? = No*

Did you use hearing aids in the past and stop using them?

- Yes
- No

---

*Display This Question:*

*If How would you rate your hearing? != Excellent*

Do you currently use cochlear implants?

- Yes
  - No
-

*Display This Question:*

*If Do you currently use cochlear implants? = Yes*

How old were you when you first started using cochlear implants?

- Less than 5 years old
- 5 years - 20 years of age
- 21 years of age - 40 years of age
- 41 years of age - 50 years of age
- 51 years of age - 60 years of age
- 61 years of age - 70 years of age
- 71 years of age - 80 years of age
- 81 years of age - 90 years of age
- Older than 90 years of age

*Display This Question:*

*If How would you rate your hearing? != Excellent*

Do you use any other type of amplification device?

- Yes
- No

*Display This Question:*

*If Do you use any other type of amplification device? = Yes*

Please list the other amplification device(s) that you use.

---

---

The next questions are about how you communicate when running errands, socializing, and working.

If you use hearing devices (hearing aids, cochlear implants, or another amplification device) most of the time, please indicate your listening ability when you are using your device(s).

---

Describe how often you ran errands or went to appointments outside of your home **before COVID-19**.

- Very often (every day or almost every day)
- Sometimes (3-5 days/week)
- Seldom (1-2 days/week)
- Never or almost never

---

Describe how often you **currently** run errands or go to appointments outside of your home.

- Very often (every day or almost every day)
- Sometimes (3-5 days/week)
- Seldom (1-2 days/week)
- Never or almost never

---

*Display This Question:*

*If Describe how often you currently run errands or go to appointments outside of your home. != Never or almost never*

When you are running errands or at an appointment outside of your home, how well are you able to understand what someone is saying in the following situations?

|                                                                    | <b>I usually have a lot of difficulty understanding</b><br>1 | 2                     | <b>I usually have some difficulty understanding</b><br>3 | 4                     | <b>I usually can understand everything or almost everything</b><br>5 | <b>I don't know/Not applicable</b> |
|--------------------------------------------------------------------|--------------------------------------------------------------|-----------------------|----------------------------------------------------------|-----------------------|----------------------------------------------------------------------|------------------------------------|
| In a quiet place when I can see the other person's face completely | <input type="radio"/>                                        | <input type="radio"/> | <input type="radio"/>                                    | <input type="radio"/> | <input type="radio"/>                                                | <input type="radio"/>              |
| In a quiet place when the other person is wearing a face mask      | <input type="radio"/>                                        | <input type="radio"/> | <input type="radio"/>                                    | <input type="radio"/> | <input type="radio"/>                                                | <input type="radio"/>              |
| In a noisy place when I can see the other person's face completely | <input type="radio"/>                                        | <input type="radio"/> | <input type="radio"/>                                    | <input type="radio"/> | <input type="radio"/>                                                | <input type="radio"/>              |
| In a noisy place when the other person is wearing a face mask      | <input type="radio"/>                                        | <input type="radio"/> | <input type="radio"/>                                    | <input type="radio"/> | <input type="radio"/>                                                | <input type="radio"/>              |
| Click to write Statement 5                                         | <input type="radio"/>                                        | <input type="radio"/> | <input type="radio"/>                                    | <input type="radio"/> | <input type="radio"/>                                                | <input type="radio"/>              |



*Display This Question:*

*If Describe how often you currently run errands or go to appointments outside of your home. != Never or almost never*

When you are running errands or at an appointment outside of your home, how much do you need to concentrate to understand what someone is saying in the following situations?

|                                                                    | <b>I need to concentrate very little</b><br>1 | 2                     | <b>I need some concentration</b><br>3 | 4                     | <b>I need to concentrate a lot</b><br>5 | <b>Don't know/Not applicable</b> |
|--------------------------------------------------------------------|-----------------------------------------------|-----------------------|---------------------------------------|-----------------------|-----------------------------------------|----------------------------------|
| In a quiet place when I can see the other person's face completely | <input type="radio"/>                         | <input type="radio"/> | <input type="radio"/>                 | <input type="radio"/> | <input type="radio"/>                   | <input type="radio"/>            |
| In a quiet place when the other person is wearing a face mask      | <input type="radio"/>                         | <input type="radio"/> | <input type="radio"/>                 | <input type="radio"/> | <input type="radio"/>                   | <input type="radio"/>            |
| In a noisy place when I can see the other person's face completely | <input type="radio"/>                         | <input type="radio"/> | <input type="radio"/>                 | <input type="radio"/> | <input type="radio"/>                   | <input type="radio"/>            |
| In a noisy place when the other person is wearing a face mask      | <input type="radio"/>                         | <input type="radio"/> | <input type="radio"/>                 | <input type="radio"/> | <input type="radio"/>                   | <input type="radio"/>            |

Do you currently leave your home to go to work?

Yes

No

---

*Display This Question:*

*If Do you currently leave your home to go to work? = Yes*

When you are working outside of your home, how well you are able to understand what someone is saying in the following situations?

|                                                                    | <b>I usually have a lot of difficulty understanding</b><br>1 | 2                     | <b>I usually have some difficulty understanding</b><br>3 | 4                     | <b>I usually understand everything or almost everything</b><br>5 | <b>I don't know/Not applicable</b> |
|--------------------------------------------------------------------|--------------------------------------------------------------|-----------------------|----------------------------------------------------------|-----------------------|------------------------------------------------------------------|------------------------------------|
| In a quiet place when I can see the other person's face completely | <input type="radio"/>                                        | <input type="radio"/> | <input type="radio"/>                                    | <input type="radio"/> | <input type="radio"/>                                            | <input type="radio"/>              |
| In a quiet place when the other person is wearing a face mask      | <input type="radio"/>                                        | <input type="radio"/> | <input type="radio"/>                                    | <input type="radio"/> | <input type="radio"/>                                            | <input type="radio"/>              |
| In a noisy place when I can see the other person's face completely | <input type="radio"/>                                        | <input type="radio"/> | <input type="radio"/>                                    | <input type="radio"/> | <input type="radio"/>                                            | <input type="radio"/>              |
| In a noisy place when the other person is wearing a face mask      | <input type="radio"/>                                        | <input type="radio"/> | <input type="radio"/>                                    | <input type="radio"/> | <input type="radio"/>                                            | <input type="radio"/>              |

*Display This Question:*

*If Do you currently leave your home to go to work? = Yes*

When you are working outside of your home, how much do you need to concentrate to understand what someone is saying in the following situations?

|                                                                    | <b>I need to concentrate very little</b><br>1 | 2                     | <b>I need some concentration</b><br>3 | 4                     | <b>I need to concentrate a lot</b><br>5 | <b>I don't know/Not applicable</b> |
|--------------------------------------------------------------------|-----------------------------------------------|-----------------------|---------------------------------------|-----------------------|-----------------------------------------|------------------------------------|
| In a quiet place when I can see the other person's face completely | <input type="radio"/>                         | <input type="radio"/> | <input type="radio"/>                 | <input type="radio"/> | <input type="radio"/>                   | <input type="radio"/>              |
| In a quiet place when the other person is wearing a face mask      | <input type="radio"/>                         | <input type="radio"/> | <input type="radio"/>                 | <input type="radio"/> | <input type="radio"/>                   | <input type="radio"/>              |
| In a noisy place when I can see the other person's face completely | <input type="radio"/>                         | <input type="radio"/> | <input type="radio"/>                 | <input type="radio"/> | <input type="radio"/>                   | <input type="radio"/>              |
| In a noisy place when the other person is wearing a face mask      | <input type="radio"/>                         | <input type="radio"/> | <input type="radio"/>                 | <input type="radio"/> | <input type="radio"/>                   | <input type="radio"/>              |

Describe how often you socialized face-to-face with friends **before COVID-19**.

- Very often (every day or almost every day)
  - Sometimes (3-5 days/week)
  - Seldom (1-2 days/week)
  - Never or almost never
- 

Describe how often you **currently** socialize face-to-face with friends.

- Very often (every day or almost every day)
  - Sometimes (3-5 days/week)
  - Seldom (1-2 days/week)
  - Never or almost never
- 

*Display This Question:*

*If Describe how often you currently socialize face-to-face with friends. != Never or almost never*

When you are socializing face-to-face, how well you are able to understand what someone is saying in the following situations?

|                                                                    | <b>I usually have a lot of difficulty understanding</b><br>1 | 2                     | <b>I usually have some difficulty understanding</b><br>3 | 4                     | <b>I usually can understand everything or almost everything</b><br>5 | <b>I don't know/Not applicable</b> |
|--------------------------------------------------------------------|--------------------------------------------------------------|-----------------------|----------------------------------------------------------|-----------------------|----------------------------------------------------------------------|------------------------------------|
| In a quiet place when I can see the other person's face completely | <input type="radio"/>                                        | <input type="radio"/> | <input type="radio"/>                                    | <input type="radio"/> | <input type="radio"/>                                                | <input type="radio"/>              |
| In a quiet place when the other person is wearing a face mask      | <input type="radio"/>                                        | <input type="radio"/> | <input type="radio"/>                                    | <input type="radio"/> | <input type="radio"/>                                                | <input type="radio"/>              |
| In a noisy place when I can see the other person's face completely | <input type="radio"/>                                        | <input type="radio"/> | <input type="radio"/>                                    | <input type="radio"/> | <input type="radio"/>                                                | <input type="radio"/>              |
| In a noisy place when the other person is wearing a face mask      | <input type="radio"/>                                        | <input type="radio"/> | <input type="radio"/>                                    | <input type="radio"/> | <input type="radio"/>                                                | <input type="radio"/>              |

*Display This Question:*

*If Describe how often you currently socialize face-to-face with friends. != Never or almost never*

When you are socializing face-to-face, how much do you need to concentrate to understand what someone is saying in the following situations?

|                                                                    | <b>I need to concentrate very little</b><br>1 | 2                     | <b>I need some concentration</b><br>3 | 4                     | <b>I need to concentrate a lot</b><br>5 | <b>I don't know/Not applicable</b> |
|--------------------------------------------------------------------|-----------------------------------------------|-----------------------|---------------------------------------|-----------------------|-----------------------------------------|------------------------------------|
| In a quiet place when I can see the other person's face completely | <input type="radio"/>                         | <input type="radio"/> | <input type="radio"/>                 | <input type="radio"/> | <input type="radio"/>                   | <input type="radio"/>              |
| In a quiet place when the other person is wearing a face mask      | <input type="radio"/>                         | <input type="radio"/> | <input type="radio"/>                 | <input type="radio"/> | <input type="radio"/>                   | <input type="radio"/>              |
| In a noisy place when I can see the other person's face completely | <input type="radio"/>                         | <input type="radio"/> | <input type="radio"/>                 | <input type="radio"/> | <input type="radio"/>                   | <input type="radio"/>              |
| In a noisy place when the other person is wearing a face mask      | <input type="radio"/>                         | <input type="radio"/> | <input type="radio"/>                 | <input type="radio"/> | <input type="radio"/>                   | <input type="radio"/>              |

Do you currently use video calling/video conferencing (e.g., Zoom, Skype, Facetime) **for work**?

Yes

No

*Display This Question:*

*If Do you currently use video calling/video conferencing (e.g., Zoom, Skype, Facetime) for work? = Yes*

When you are using video calling or video conferencing for work, how well you are able to understand what someone is saying when there are no technological problems?

|                 | <b>I usually have a lot of difficulty understanding</b><br>1 | 2                     | <b>I usually have some difficulty understanding</b><br>3 | 4                     | <b>I usually can understand everything or almost everything</b><br>5 | <b>I don't know/Not applicable</b> |
|-----------------|--------------------------------------------------------------|-----------------------|----------------------------------------------------------|-----------------------|----------------------------------------------------------------------|------------------------------------|
| In a quiet room | <input type="radio"/>                                        | <input type="radio"/> | <input type="radio"/>                                    | <input type="radio"/> | <input type="radio"/>                                                | <input type="radio"/>              |
| In a noisy room | <input type="radio"/>                                        | <input type="radio"/> | <input type="radio"/>                                    | <input type="radio"/> | <input type="radio"/>                                                | <input type="radio"/>              |

*Display This Question:*

*If Do you currently use video calling/video conferencing (e.g., Zoom, Skype, Facetime) for work? = Yes*



When you are using video calling or video conferencing for work, how much do you need to concentrate to understand what someone when there are no technological problems?

|                 | <b>I need to concentrate very little</b><br>1 | 2                     | <b>I need some concentration</b><br>3 | 4                     | <b>I need to concentrate a lot</b><br>5 | <b>I don't know/Not applicable</b> |
|-----------------|-----------------------------------------------|-----------------------|---------------------------------------|-----------------------|-----------------------------------------|------------------------------------|
| In a quiet room | <input type="radio"/>                         | <input type="radio"/> | <input type="radio"/>                 | <input type="radio"/> | <input type="radio"/>                   | <input type="radio"/>              |
| In a noisy room | <input type="radio"/>                         | <input type="radio"/> | <input type="radio"/>                 | <input type="radio"/> | <input type="radio"/>                   | <input type="radio"/>              |

Do you currently use video calling/video conferencing (e.g., Zoom, Skype, Facetime) **for socializing**?

- Yes
- No

*Display This Question:*

*If Do you currently use video calling/video conferencing (e.g., Zoom, Skype, Facetime) for socializing? = Yes*

When you are using video calling or video conferencing for socializing, how well you are able to understand what someone is saying when there are no technological problems?

|                 | <b>I usually have a lot of difficulty understanding</b><br>1 | 2                     | <b>I usually have some difficulty understanding</b><br>3 | 4                     | <b>I usually can understand everything or almost everything</b><br>5 | <b>I don't know/Not applicable</b> |
|-----------------|--------------------------------------------------------------|-----------------------|----------------------------------------------------------|-----------------------|----------------------------------------------------------------------|------------------------------------|
| In a quiet room | <input type="radio"/>                                        | <input type="radio"/> | <input type="radio"/>                                    | <input type="radio"/> | <input type="radio"/>                                                | <input type="radio"/>              |
| In a noisy room | <input type="radio"/>                                        | <input type="radio"/> | <input type="radio"/>                                    | <input type="radio"/> | <input type="radio"/>                                                | <input type="radio"/>              |

*Display This Question:*

*If Do you currently use video calling/video conferencing (e.g., Zoom, Skype, Facetime) for socializing? = Yes*

When you are using video calling or video conferencing for socializing, how much do you need to concentrate to understand what someone is saying when there are no technological problems?

|                 | <b>I need to concentrate very little</b><br>1 | 2                     | <b>I need some concentration</b><br>3 | 4                     | <b>I need to concentrate a lot</b><br>5 | <b>I don't know/Not applicable</b> |
|-----------------|-----------------------------------------------|-----------------------|---------------------------------------|-----------------------|-----------------------------------------|------------------------------------|
| In a quiet room | <input type="radio"/>                         | <input type="radio"/> | <input type="radio"/>                 | <input type="radio"/> | <input type="radio"/>                   | <input type="radio"/>              |
| In a noisy room | <input type="radio"/>                         | <input type="radio"/> | <input type="radio"/>                 | <input type="radio"/> | <input type="radio"/>                   | <input type="radio"/>              |

Are there any strategies that you find especially helpful when talking to someone who is wearing a face mask? If so, please list them below.

---

---

---

---

---

Are there any strategies that you find especially helpful when you are listening on a video call or video conference? If so, please list them below.

---

---

---

---

---

Have you had a diagnosis of Covid-19 from a doctor?

- Yes
- No

*Display This Question:*

*If Have you had a diagnosis of Covid-19 from a doctor? = Yes*

Have you noticed a change in your hearing since contracting Covid-19?

- Yes
- No

*Display This Question:*

*If Have you noticed a change in your hearing since contracting Covid-19? = Yes*

Please explain how your hearing has changed since your Covid-19 diagnosis.

---

---
